# Supplementary material for: One-step synthesis of N,N′-dialkyl-p-phenylenediamines
Source: Royal Society of Chemistry journal article supplement (doi:10.1039/b607632g), 2006-11-24

$^1\text{H}$  NMR (400 MHz,  $\text{CD}_3\text{OD}$ , TMS) spectrum of *N,N'*-diethyl-*p*-phenylenediamine dihydrochloride (**1a**.2HCl)

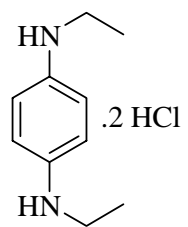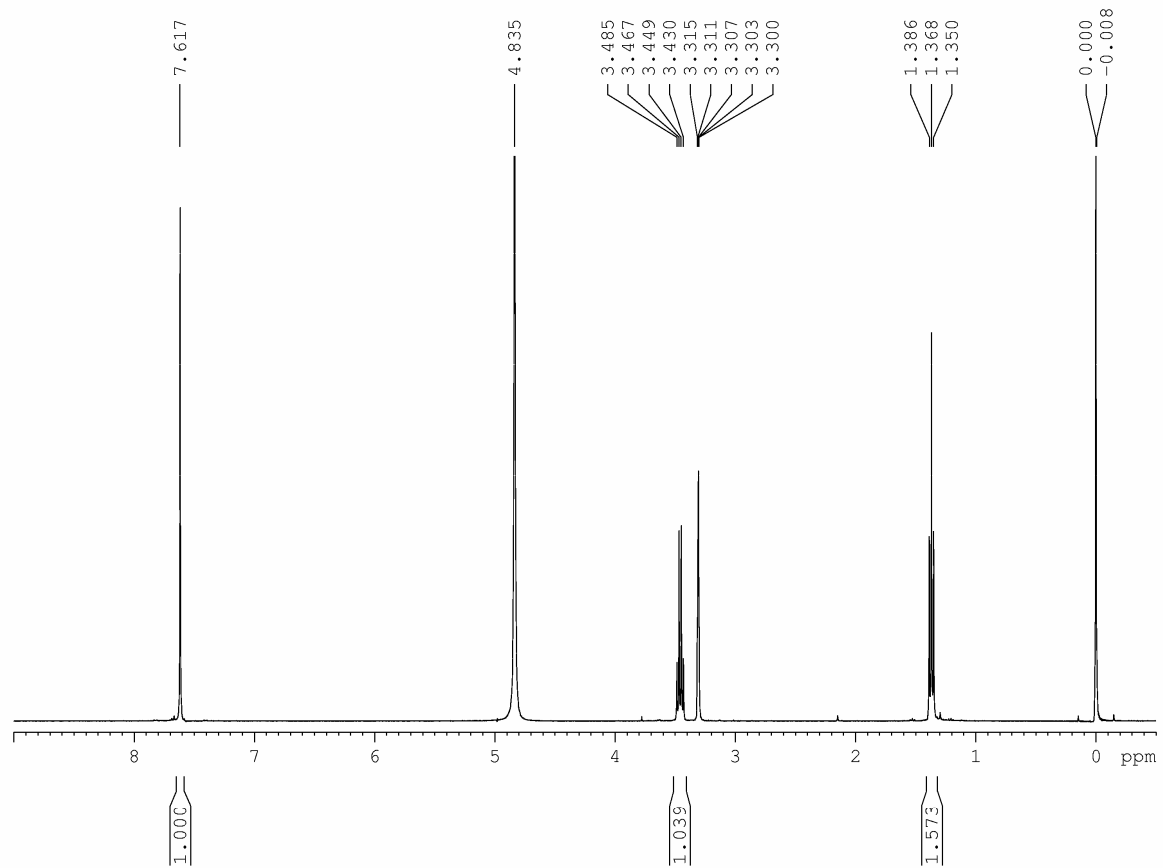

$^1\text{H}$  NMR (400 MHz,  $\text{CD}_3\text{OD}$ , TMS) spectrum of *N,N'*-dipropyl-*p*-phenylenediamine dihydrochloride (**1b.2HCl**)

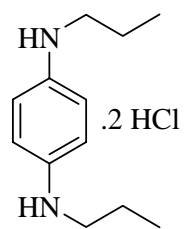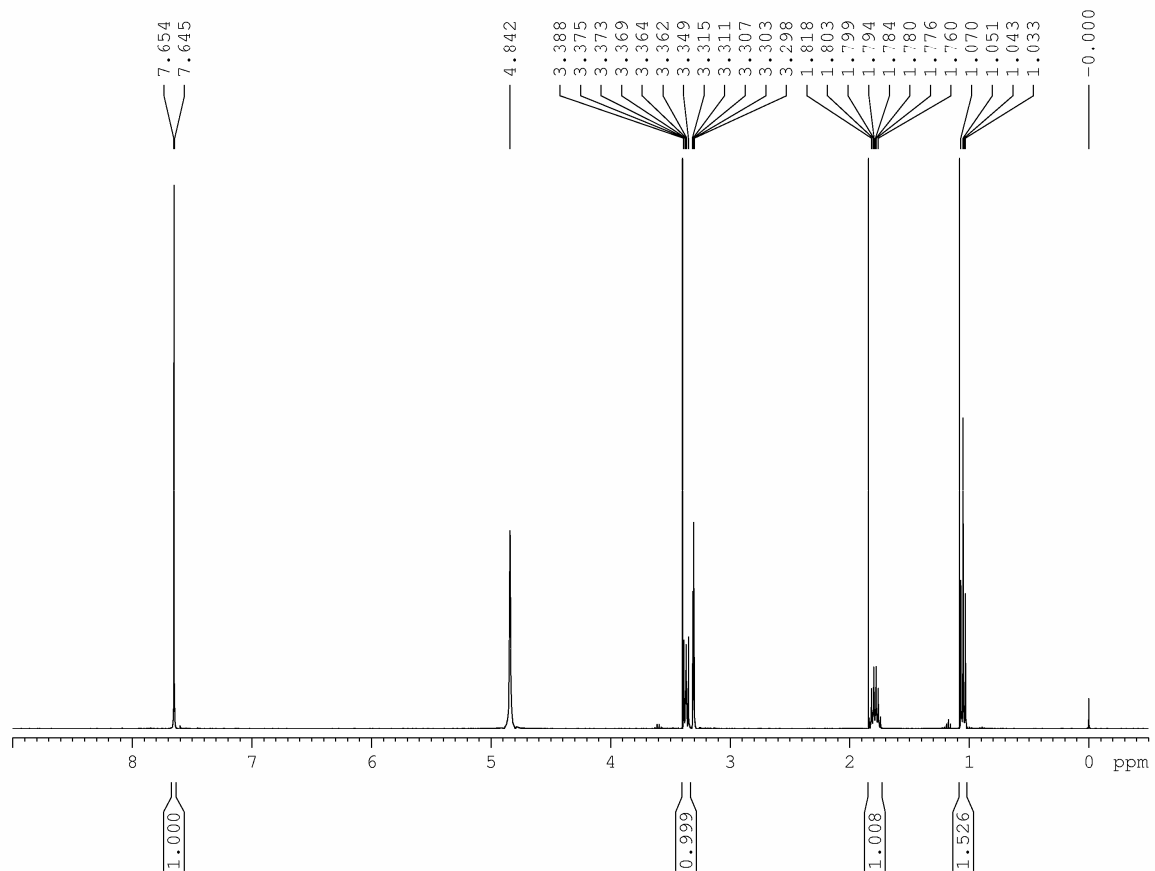

$^1\text{H}$  NMR (400 MHz,  $\text{CD}_3\text{OD}$ , TMS) spectrum of *N,N'*-dibutyl-*p*-phenylenediamine dihydrochloride (**1c.2HCl**)

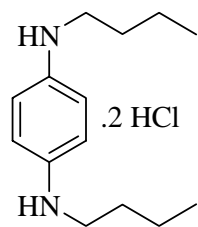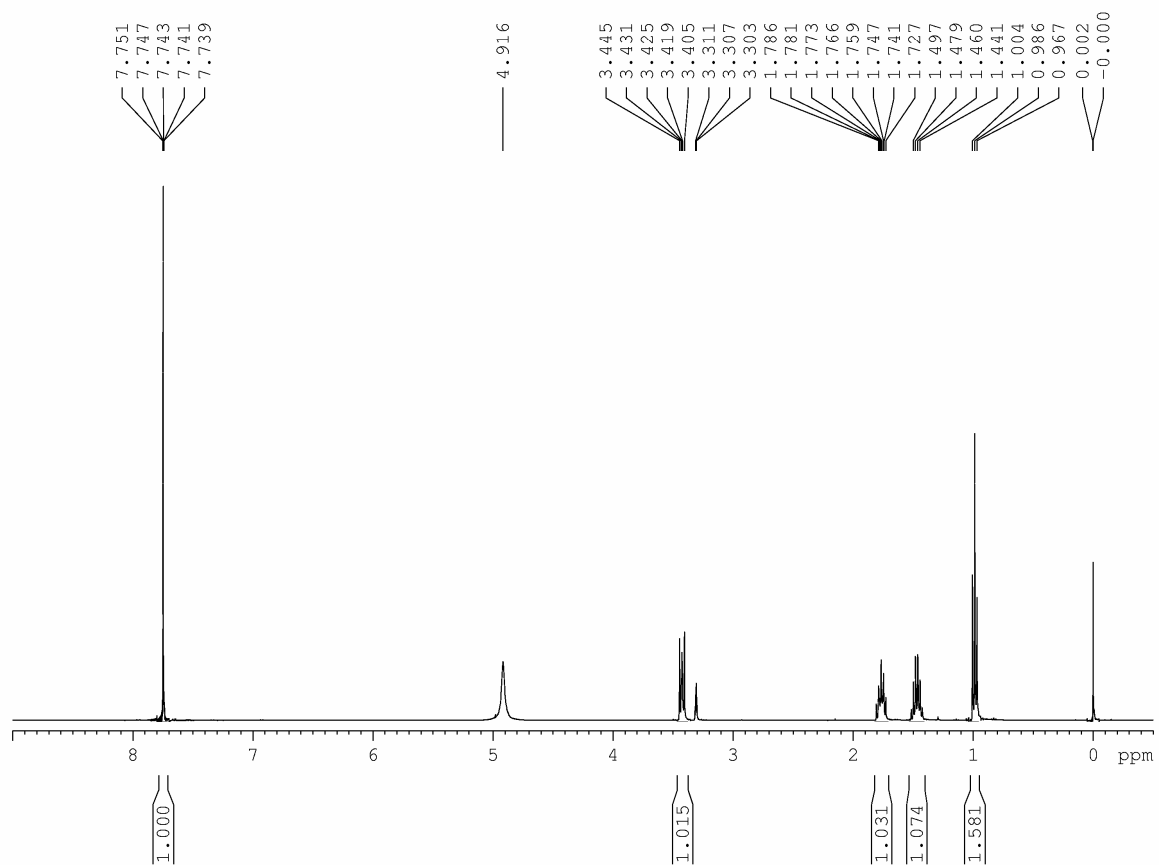

$^1\text{H}$  NMR (400 MHz,  $\text{CD}_3\text{OD}$ , TMS) spectrum of *N,N'*-dihexyl-*p*-phenylenediamine dihydrochloride (**1d**.2HCl)

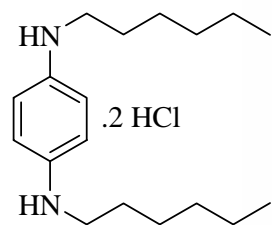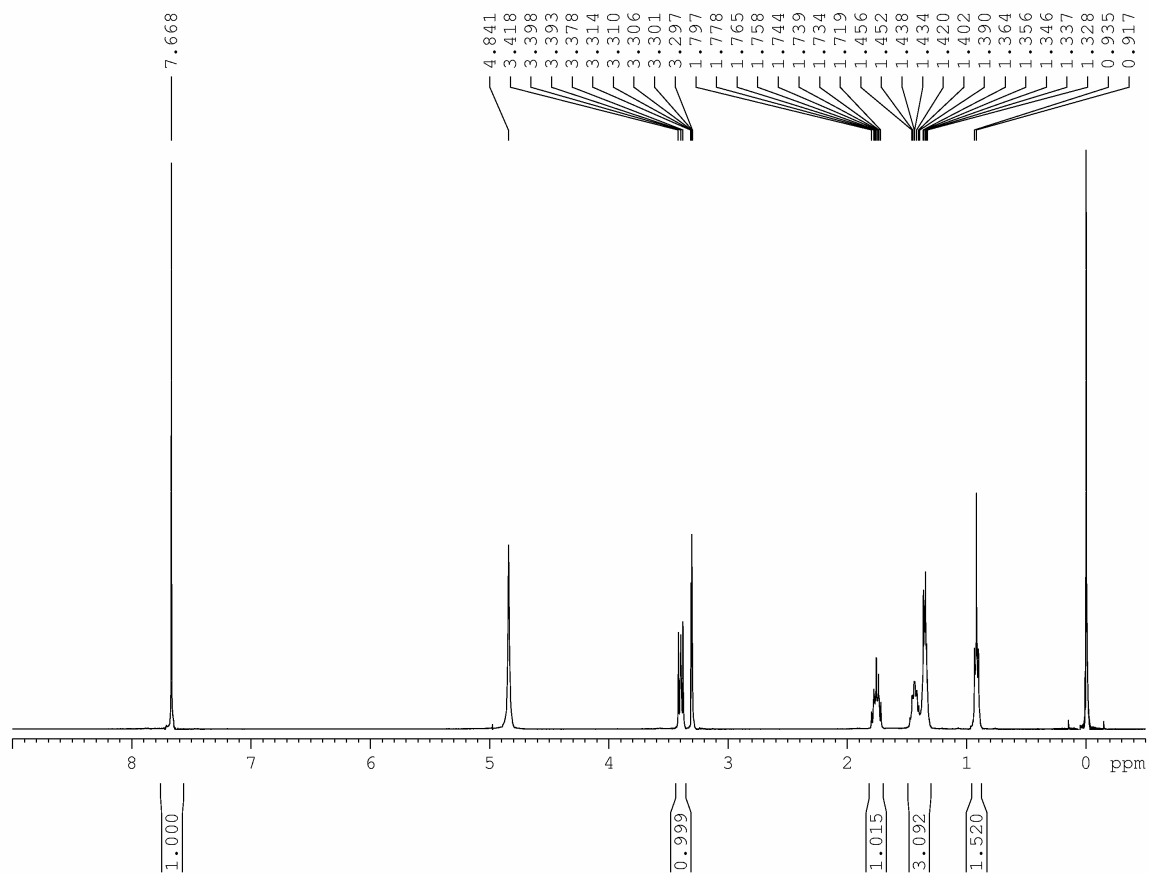

$^1\text{H}$  NMR (400 MHz,  $\text{CD}_3\text{OD}$ , TMS) spectrum of  $N,N'$ -dioctyl- $p$ -phenylenediamine dihydrochloride (**1e**.2HCl)

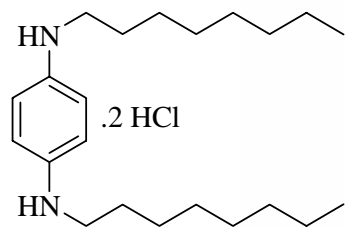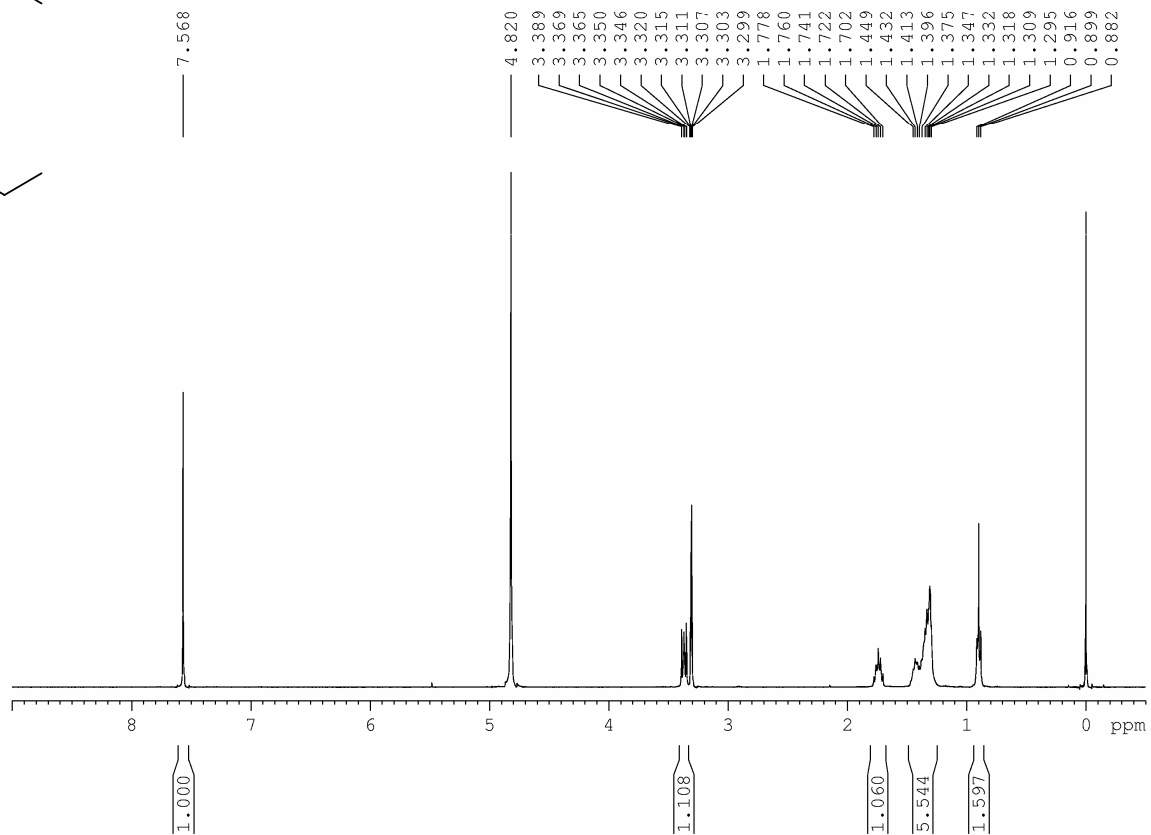

$^1\text{H}$  NMR (400 MHz,  $\text{CD}_3\text{OD}$ , TMS) spectrum of  $N,N'$ -dibenzyl- $p$ -phenylenediamine dihydrochloride (**1f**.2HCl)

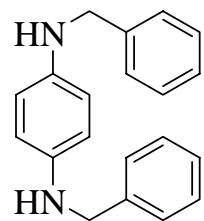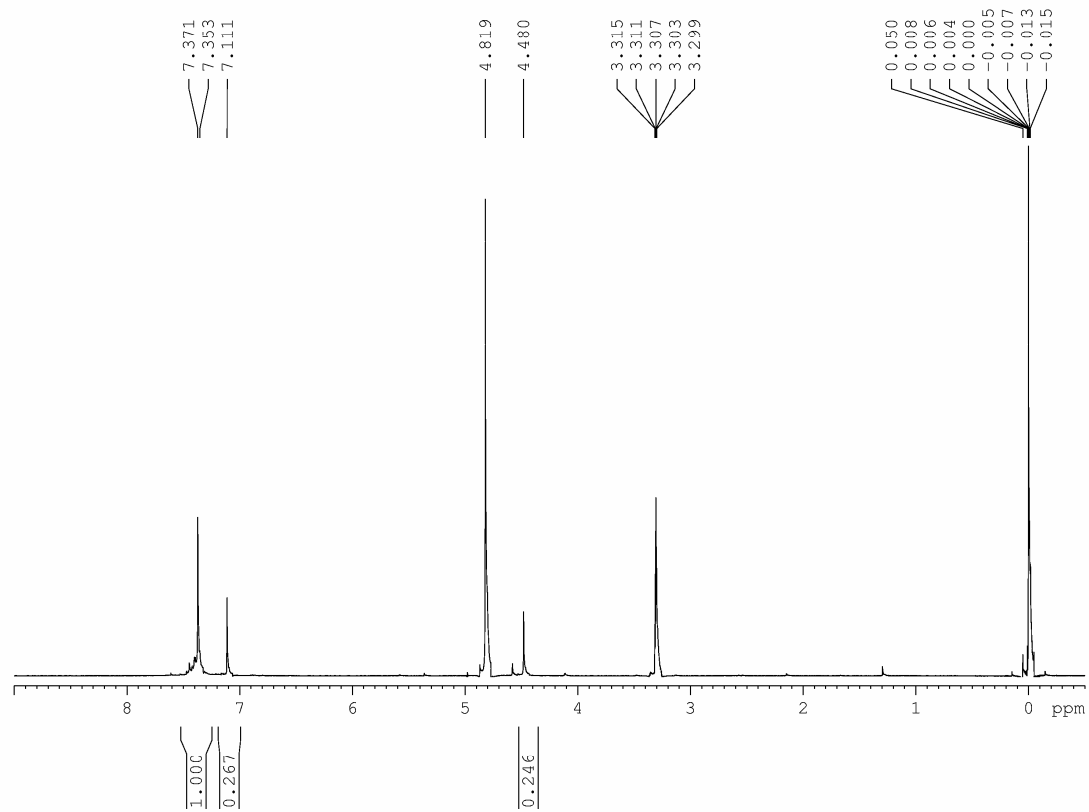

$^1\text{H}$  NMR (400 MHz,  $\text{CDCl}_3$ , TMS) spectrum of *N,N'*-diphenethyl-*p*-phenylenediamine (**1g**)

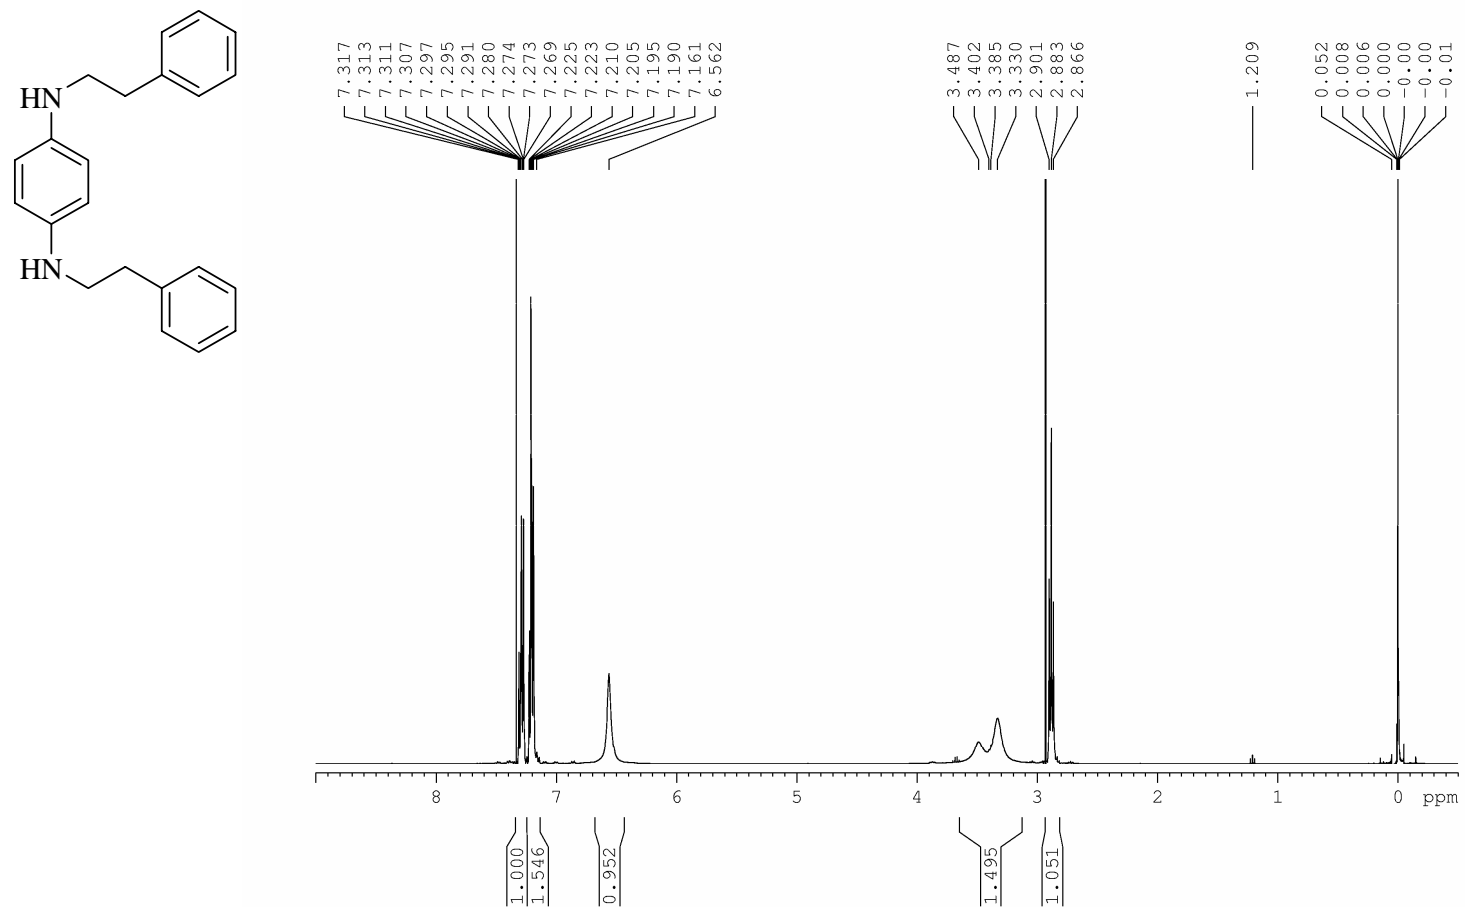

Supplement: b607632g.pdf [file b607632g.pdf]
